# Supplementary material for: Sleep Habits, Academic Performance and Health Behaviors of Adolescents in Southern Greece
Source: MDPI journal article supplement (doi:10.3390/healthcare12070775), 2024-04-03
Supplement: s1 [file s1]

## Supplementary Material

Table S1. Sleeping hour of students during working days at 6 different classes, Post-hoc analysis  $p < 0.001$ : significant different .

| (I) Classs    | <i>p</i>         |                  |               |                  |                  |                  |
|---------------|------------------|------------------|---------------|------------------|------------------|------------------|
|               | (J) Classs       |                  |               |                  |                  |                  |
|               | Gymnasium 1st    | Gymnasium 2st    | Gymnasium 3rd | Lyceum 1st       | Lyceum 2nd       | Lyceum 3rd       |
| Gymnasium 1st |                  | 0.531            | <b>0.008</b>  | <b>&lt;0.001</b> | <b>&lt;0.001</b> | <b>&lt;0.001</b> |
| Gymnasium 2st | 0.531            |                  | 1.000         | <b>0.003</b>     | <b>&lt;0.001</b> | <b>&lt;0.001</b> |
| Gymnasium 3rd | 0.008            | 1.000            |               | 1.000            | 1.000            | <b>0.018</b>     |
| Lyceum 1st    | <b>&lt;0.001</b> | 0.003            | 1.000         |                  | 1.000            | <b>0.003</b>     |
| Lyceum 2nd    | <b>&lt;0.001</b> | <b>&lt;0.001</b> | 1.000         | 1.000            |                  | 0.067            |
| Lyceum 3rd    | <b>&lt;0.001</b> | <b>&lt;0.001</b> | 0.018         | 0.003            | 0.067            |                  |

Table S2. Sleeping hour of students during weekend days at 6 different classes Post-hoc analysis  $p < 0.001$ : significant different.

| (I) Classs    | Sig.             |                  |                  |                  |                  |                  |
|---------------|------------------|------------------|------------------|------------------|------------------|------------------|
|               | (J) Classs       |                  |                  |                  |                  |                  |
|               | Gymnasium 1st    | Gymnasium 2st    | Gymnasium 3rd    | Lyceum 1st       | Lyceum 2nd       | Lyceum 3rd       |
| Gymnasium 1st |                  | <b>1.000</b>     | <b>&lt;0.001</b> | <b>&lt;0.001</b> | <b>&lt;0.001</b> | <b>&lt;0.001</b> |
| Gymnasium 2st | 1.000            |                  | <b>0.016</b>     | <b>&lt;0.001</b> | <b>&lt;0.001</b> | <b>&lt;0.001</b> |
| Gymnasium 3rd | <b>&lt;0.001</b> | 0.016            |                  | 1.000            | 1.000            | 1.000            |
| Lyceum 1st    | <b>&lt;0.001</b> | <b>&lt;0.001</b> | 1.000            |                  | 1.000            | 1.000            |
| Lyceum 2nd    | <b>&lt;0.001</b> | <b>&lt;0.001</b> | 1.000            | 1.000            |                  | 0.931            |
| Lyceum 3rd    | <b>&lt;0.001</b> | <b>&lt;0.001</b> | 1.000            | 1.000            | 0.931            |                  |

Table S3. Health habits by age

|                             |              | 13           | 14           | 15           | 16           | 17           | 18           | 19           | <i>p</i> |
|-----------------------------|--------------|--------------|--------------|--------------|--------------|--------------|--------------|--------------|----------|
|                             |              | <i>n</i> (%) |          |
| Smoking                     | Never/Rarely | 114 (97.4)   | 88 (100)     | 45 (95.7)    | 206 (90.4)   | 171 (88.6)   | 123 (81.5)   | 3 (42.9)     | <0.001   |
|                             | Sometimes    | 2 (1.7)      | 0 (0)        | 1 (2.1)      | 18 (7.9)     | 13 (6.7)     | 21 (13.9)    | 1 (14.3)     |          |
|                             | Often        | 1 (0.9)      | 0 (0)        | 1 (2.1)      | 4 (1.8)      | 9 (4.7)      | 7 (4.6)      | 3 (42.9)     |          |
| Drinking Alcohol            | Never/Rarely | 105 (89.7)   | 79 (89.8)    | 39 (83)      | 110 (48.2)   | 66 (34.2)    | 42 (27.8)    | 1 (14.3)     | <0.001   |
|                             | Sometimes    | 11 (9.4)     | 8 (9.1)      | 8 (17)       | 115 (50.4)   | 121 (62.7)   | 106 (70.2)   | 4 (57.1)     |          |
|                             | Often        | 1 (0.9)      | 1 (1.1)      | 0 (0)        | 3 (1.3)      | 6 (3.1)      | 3 (2)        | 2 (28.6)     |          |
| Exercise                    | Never/Rarely | 10 (8.5)     | 11 (12.5)    | 2 (4.3)      | 37 (16.2)    | 40 (20.7)    | 50 (33.1)    | 4 (57.1)     | <0.001   |
|                             | Sometimes    | 17 (14.5)    | 17 (19.3)    | 14 (29.8)    | 59 (25.9)    | 57 (29.5)    | 61 (40.4)    | 1 (14.3)     |          |
|                             | Often        | 90 (76.9)    | 60 (68.2)    | 31 (66)      | 132 (57.9)   | 96 (49.7)    | 40 (26.5)    | 2 (28.6)     |          |
| Coffee and caffeine product | Never/Rarely | 91 (77.8)    | 73 (83)      | 32 (68.1)    | 122 (53.5)   | 120 (62.2)   | 51 (33.8)    | 2 (28.6)     | <0.001   |
|                             | Sometimes    | 20 (17.1)    | 13 (14.8)    | 11 (23.4)    | 80 (35.1)    | 44 (22.8)    | 54 (35.8)    | 3 (42.9)     |          |
|                             | Often        | 6 (5.1)      | 2 (2.3)      | 4 (8.5)      | 26 (11.4)    | 29 (15)      | 46 (30.5)    | 2 (28.6)     |          |

Table S4. Adjusted ORs with 95% CIs of sleeping  $\geq 8$  hours per day on students' grades.

| Grades (18+)            | OR          | 95% C.I. for OR |      | p                |
|-------------------------|-------------|-----------------|------|------------------|
|                         |             | LL              | UL   |                  |
| <b>Females</b>          | <b>1.84</b> | 1.39            | 2.43 | <b>&lt;0.001</b> |
| Lyceum                  | 0.73        | 0.54            | 0.99 | <b>0.045</b>     |
| Sleeping $\geq 8$ hours | 1.48        | 1.06            | 2.07 | <b>0.022</b>     |
